# Supplementary material
Source: PubMed Central journal article supplement (PMC2824777)
Supplement: NIHMS165056-supplement-1.pdf [file NIHMS165056-supplement-1.pdf]

## SUPPLEMENTARY DATA

### COX-2 is a Novel Transcriptional Target of the Nuclear EGFR-STAT3 and EGFRvIII-STAT3 Signaling Axes

**Supplementary Table I Genes significantly up-regulated by EGF in U87MG-EGFR cells compared to U87MG-EGFRdNLS and U87MG-vector cells.** DNA microarray data were subjected to ANOVA analysis to identify genes that are expressed in U87MG-EGFR cells at a significantly higher level, namely, at least 1.9-fold and  $p < 0.05$ , compared to U87MG-EGFRdNLS and U87MG-vector cells. The analysis revealed 19 known human genes.

| Probe Set ID | Gene Name                                                                     | Gene Symbol        | EGF/control U87MG-EGFR | p-value EGF/control U87MG-EGFR | EGF/control U87MG-EGFRdNLS | p-value EGF/control U87MG-EGFRdNLS |
|--------------|-------------------------------------------------------------------------------|--------------------|------------------------|--------------------------------|----------------------------|------------------------------------|
| 231577_s_at  | guanylate binding protein 1, interferon inducible, 67kDa                      | GBP1               | 8.06                   | 0.007                          | 1.00                       | 0.99                               |
| 1554997_a_at | cyclooxygenase-2                                                              | COX-2              | 5.00                   | 0.007                          | 0.98                       | 0.96                               |
| 209719_x_at  | serpin peptidase inhibitor, clade B (ovalbumin), member 3                     | SERPINB3<br>SCCCA1 | 4.48                   | 0.045                          | 1.02                       | 0.96                               |
| 229450_at    | interferon induced protein with tetratricopeptide repeats 3                   | IFIT3              | 4.26                   | 0.002                          | 1.04                       | 0.81                               |
| 208370_s_at  | Down syndrome critical region gene 1                                          | DSCR1              | 3.45                   | 0.044                          | 0.97                       | 0.62                               |
| 239445_at    | RAB6A, member RAS oncogene family                                             | RAB6A              | 3.12                   | 0.016                          | 0.98                       | 0.92                               |
| 226757_at    | interferon-induced protein with tetratricopeptide repeats 2                   | IFIT2              | 3.06                   | 0.004                          | 1.04                       | 0.82                               |
| 206432_at    | hyaluronan synthase 2                                                         | HAS2               | 3.03                   | 0.029                          | 1.02                       | 0.94                               |
| 208389_s_at  | solute carrier family 1 (glial high affinity glutamate transporter), member 2 | SLC1A2             | 2.80                   | 0.003                          | 1.01                       | 0.98                               |
| 216588_at    | ribosomal protein L7                                                          | RPL7               | 2.80                   | 0.046                          | 1.01                       | 0.99                               |
| 206133_at    | XIAP associated factor-1                                                      | BIRC4BP            | 2.63                   | 0.031                          | 0.99                       | 0.97                               |
| 237209_s_at  | nuclear factor related to kappaB binding protein                              | NFRKB              | 2.50                   | 0.048                          | 1.05                       | 0.91                               |
| 234986_at    | Glutamate cysteine ligase, modifier                                           | GCLM               | 2.12                   | 0.019                          | 0.96                       | 0.82                               |

|             | subunit                                                  |                  |      |       |      |      |
|-------------|----------------------------------------------------------|------------------|------|-------|------|------|
| 209969_s_at | signal transducer and activator of transcription 1,      | STAT1            | 2.00 | 0.046 | 1.02 | 0.80 |
| 219209_at   | interferon induced with helicase C domain 1              | IFIH1            | 2.00 | 0.019 | 1.01 | 0.97 |
| 227609_at   | epithelial stromal interaction 1 (breast)                | EPSTI1<br>BRESI1 | 1.94 | 0.017 | 0.96 | 0.78 |
| 202948_at   | interleukin 1 receptor, type I                           | IL1R1            | 1.93 | 0.045 | 0.99 | 0.97 |
| 223690_at   | latent transforming growth factor beta binding protein 2 | LTBP2            | 1.90 | 0.001 | 1.03 | 0.93 |
| 230511_at   | cAMP responsive element modulator                        | CREM             | 1.88 | 0.047 | 0.99 | 0.94 |

**Supplementary Fig. S1. EGF induces EGFR nuclear transport in a GBM cell line expressing endogenous EGFR, as shown by immunofluorescence staining and confocal microscopy.**

**A:** T98G human GBM cells were serum-starved for 24 hrs and stimulated with EGF (100 ng/ml) for 0 and 15 min. The cells were fixed and subjected to immunofluorescence staining and confocal microscopy to determine the extent of EGFR nuclear translocation. EGFR is indicated by green fluorescence whereas nuclei are marked by propidium iodide (PI) in red. Nuclear EGFR is shown as yellow merged signals (arrows).

**B:** Negative control with secondary antibody only did not yield any non-specific signal.

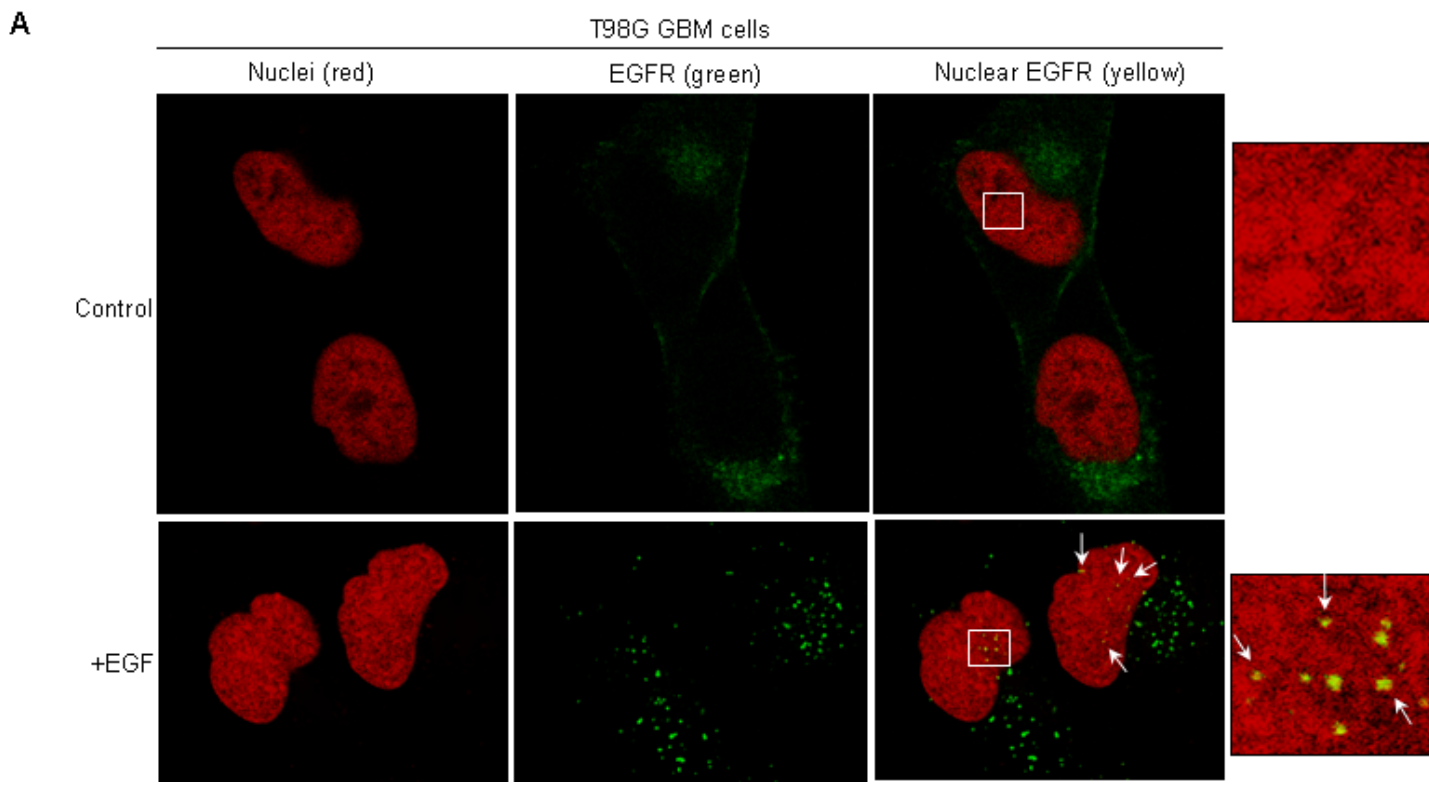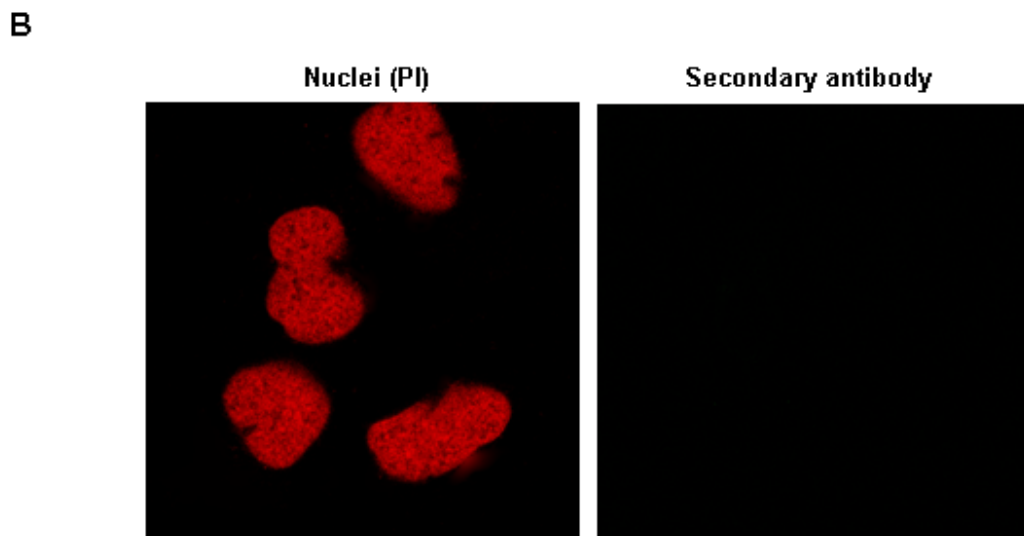

**Supplementary Fig. S2 EGFR-NLS fails to undergo nuclear translocation.**

**A:** Serum-starved U87MG-EGFR and U87MG-EGFRdNLS cells were stimulated with EGF (100 ng/ml) for 0 and 15 min and subjected to immunofluorescence staining and confocal microscopy. EGFR staining is indicated by green fluorescence while nuclei stained red for propidium iodide. Nuclear EGFR is indicated by yellow fluorescence, merged signals of green and red (arrows).

**B:** Negative control with secondary antibody only did not yield any non-specific signal.

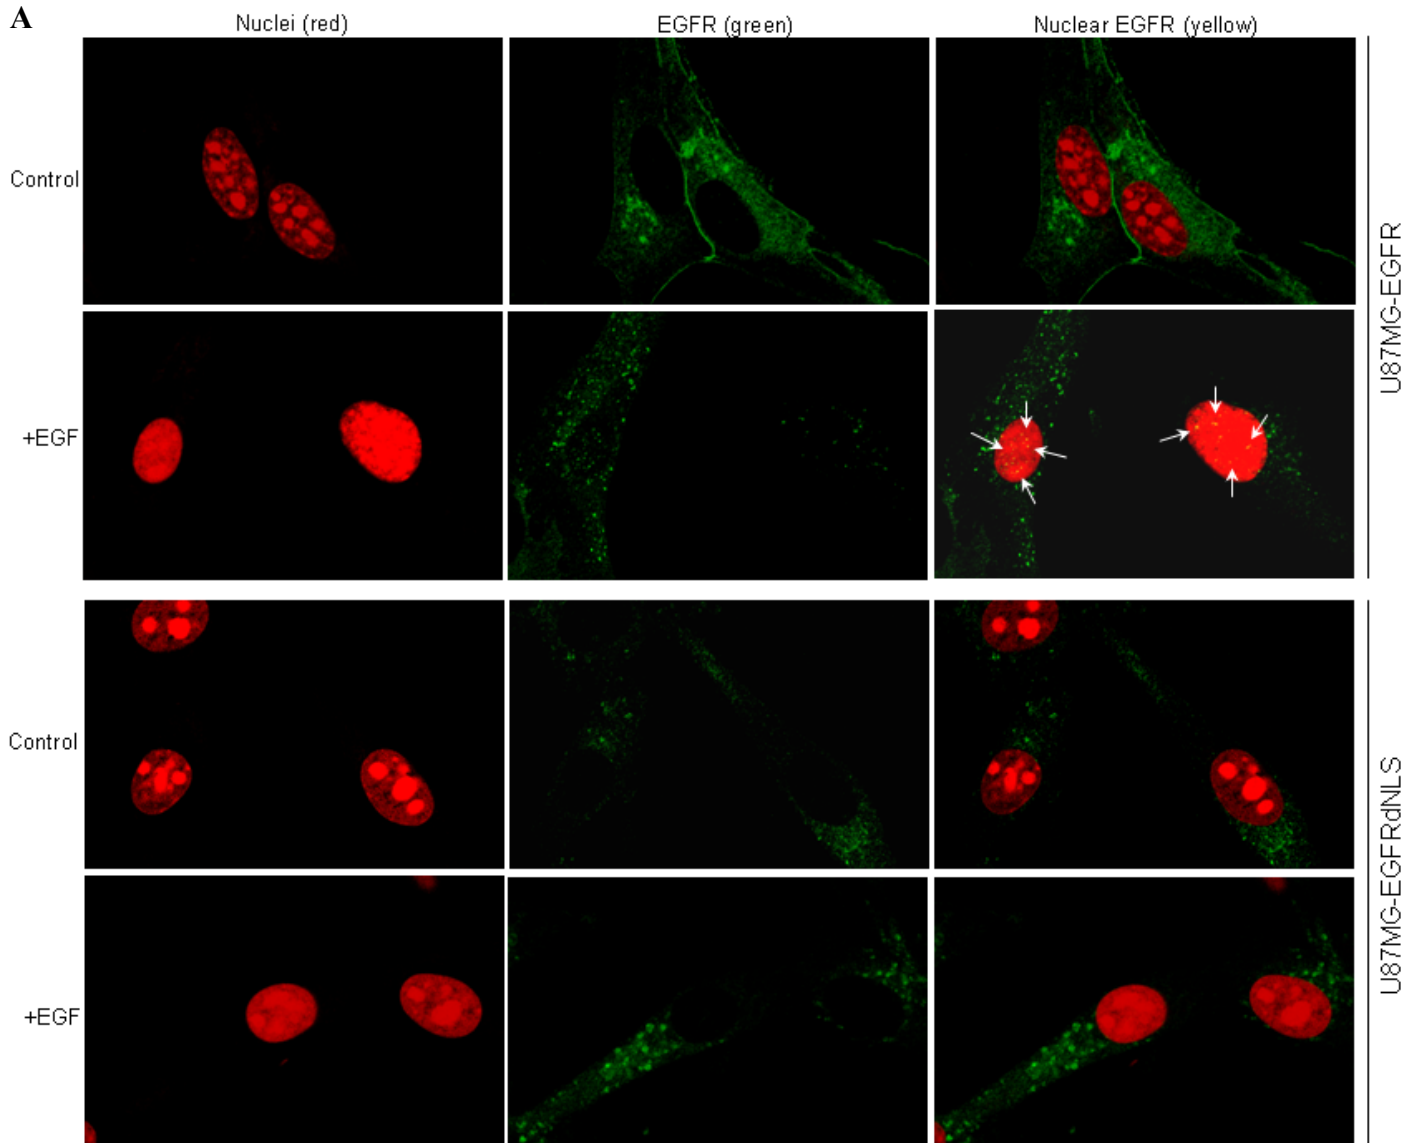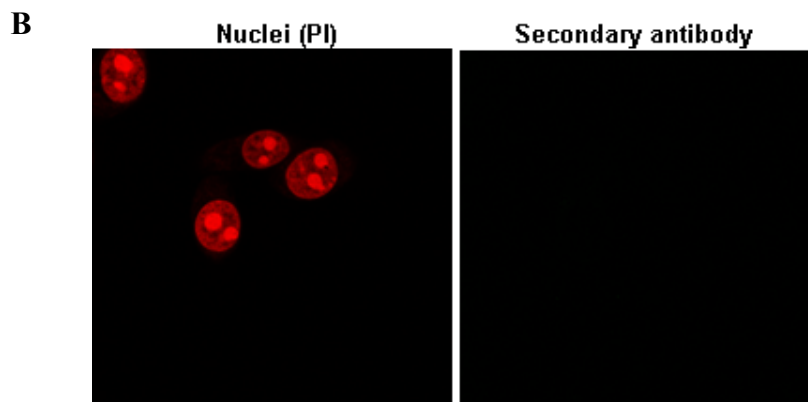

**Supplementary Fig. S3.** U87MG-EGFRvIIIΔNLS cells formed colonies to the extent similar to U87MG-EGFRvIII cells.

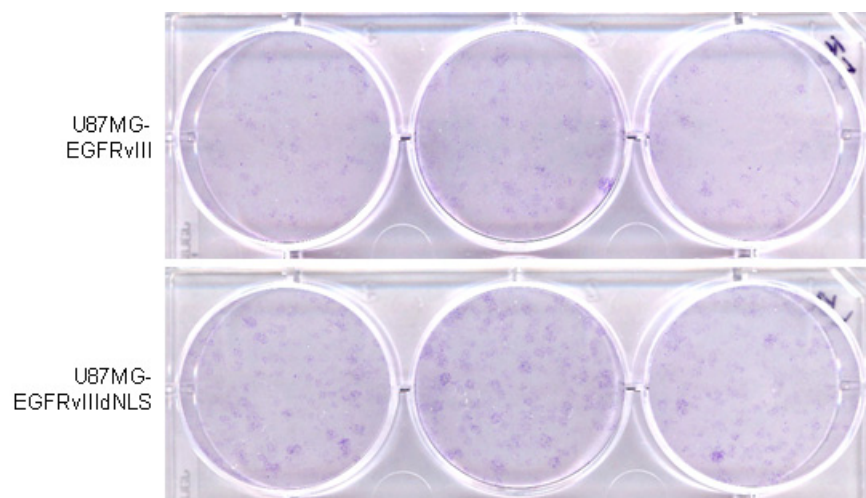

## **Supplementary Materials and Methods**

### **Detection of nuclear EGFR/EGFRvIII via immunofluorescence staining and confocal microscopy.**

Tumor cells were seeded in 8-well Lab-Tek chamber slides (Nunc Inc., Rochester, NY) for 24 hrs. After washing with ice-cold PBS, the cells were fixed in 4% paraformaldehyde for 15 min and permeablized with 0.2% Triton-X100 for 5 min. Following treatment with 10% normal goat serum/1% BSA for 60 min, the cells were incubated with anti-Myc monoclonal antibody overnight at 4°C. After three washes with PBS, the cells were incubated with goat anti-mouse secondary antibody (1:200, Vector Lab) tagged with Texas Red or fluorescein and after which, they were mounted with VECTASHIELD Mounting Medium containing DAPI or propidium iodide (for nuclei detection) and then examined under a Zeiss LSM 510 confocal microscope.
